# Supplementary material
Source: publisher site journal article supplement (https://www.spandidos-publications.com/8181/downloadSupplementary)
Supplement: Supplementary file 1 [file downloadSupplementary]

**Table SI.** GEO dataset on cervix.

|                          | <b>GSE44001</b>        | <b>GSE63514</b>       | <b>GSE122697</b>      | <b>GSE146114</b>       | <b>GSE7803</b>            | <b>GSE30760</b>           |
|--------------------------|------------------------|-----------------------|-----------------------|------------------------|---------------------------|---------------------------|
| Platform                 | GPL14951               | GPL570                | GPL10558              | GPL6884                | GPL96                     | GPL8490                   |
| Species                  | <i>Homo sapiens</i>    | <i>Homo sapiens</i>   | <i>Homo sapiens</i>   | <i>Homo sapiens</i>    | <i>Homo sapiens</i>       | <i>Homo sapiens</i>       |
| Samples in disease group | 300                    | 28                    | 11                    | 83                     | 21                        | 47                        |
| Samples in control group | 0                      | 24                    | 5                     | 25                     | 10                        | 168                       |
| (Ref.)                   | PMID:2414511<br>3 (23) | PMID:26056290<br>(22) | PMID:31229557<br>(20) | PMID:325801<br>39 (21) | PMID:179<br>74957<br>(25) | PMID:<br>27103033<br>(24) |

GEO, Gene Expression Omnibus.

**Table SII.** Lactylation-related genes

| <b>ACAT2</b> | <b>ACIN1</b> | <b>ADAR</b> | <b>ADNP</b> | <b>AHNAK</b> | <b>ALB</b> |
|--------------|--------------|-------------|-------------|--------------|------------|
| ALDH1A1      | ALDOA        | ALDOB       | ALYREF      | ARGLU1       | ARID1A     |
| ARID3A       | ARID3B       | ARPP19      | BCLAF1      | BOLA2        | BRD4       |
| BTF3         | BZW1         | BZW2        | C19orf53    | CACYBP       | CALD1      |
| CALM1        | CALML5       | CALR        | CBR1        | CBX3         | CBX5       |
| CCNA2        | CCT5         | CD2BP2      | CDC5L       | CDV3         | CDV3       |
| CDYL         | CEBPZ        | CFDP1       | CHD4        | CHERP        | CNN2       |
| CNN3         | COPS4        | CRABP2      | CSRP1       | CSRP2        | CWC15      |
| DDX17        | DDX18        | DDX21       | DDX39A      | DDX39B       | DDX3X      |
| DDX41        | DDX42        | DDX46       | DDX5        | DECR1        | DFFA       |
| DHRS7        | DHX16        | DHX9        | EAF1        | ECHDC1       | EDF1       |
| EEF1A1       | EEF1G        | EEF2        | EHMT2       | EIF3D        | EIF3J      |
| EIF4G1       | EIF4G2       | EIF4H       | EMG1        | ENO1         | ENSA       |
| FABP5        | FAM50A       | FKBP3       | FLYWCH2     | FUBP1        | G6PD       |
| GAPDH        | GATAD2A      | GATAD2B     | GFAP        | GIGYF2       | GTF2F1     |
| GTF2I        | H1-2         | H1-3        | H1-5        | H2AFV        | H2AFZ      |
| H2AJ         | H2AX         | H2AZ1       | H2AZ2       | H2BC13       | H2BC14     |
| H2BC18       | H2BC5        | H2BU1       | H3-3A       | H3C1         | H3C15      |
| H4C1         | HCFC1        | HDAC1       | HDAC2       | HDGF         | HDGFL2     |
| HEXIM1       | HIST1H1C     | HIST1H2BB   | HIST1H2BD   | HIST1H2BH    | HIST1H2BK  |
| HIST1H2BL    | HIST1H2BN    | HIST1H2BO   | HIST1H3A    | HIST1H4A     | HIST2H2BE  |
| HIST2H2BF    | HISTIH2BH    | HLTF        | HMGA1       | HMGB1        | HMGN1      |
| HMGN2        | HMGN3        | HMGN4       | HNRNPA1     | HNRNPC       | HNRNPD     |
| HNRNPF       | HNRNPH1      | HNRNPK      | HNRNPL      | HNRNPM       | HNRNPU     |
| HSDL2        | HSPE1        | IARS2       | IFI16       | IK           | IKZF1      |
| ILF2         | ILF3         | IRF2BP2     | JMJD1C      | JPT1         | JPT2       |
| KHDRBS1      | KHSRP        | KIF2C       | KRT1        | KRT10        | LAP3       |
| LCP1         | LDHB         | LEMD3       | LGALS1      | LRPPRC       | LSP1       |
| MAGOH        | MAGOHB       | MAP2K4      | MAPRE1      | MBD2         | MBP        |
| MDC1         | MKI67        | MNDA        | MPHOSPH6    | MSN          | MTA1       |
| MTA2         | MYH13        | NCDN        | NCL         | NEFL         | NHLRC2     |
| NOC3L        | NOLC1        | NONO        | NOP2        | NPM1         | NSUN2      |
| NUCKS1       | NUDT21       | NUDT5       | NUP133      | NUP50        | PABPC1     |
| PABPN1       | PAK2         | PARP1       | PCBP1       | PCBP2        | PCMT1      |
| PCNP         | PDAP1        | PDLIM1      | PES1        | PFKM         | PFKP       |
| PFN1         | PGK1         | PHC3        | PHF6        | PKM2         | POLDIP3    |
| PPIA         | PPIL4        | PPM1G       | PPP1CB      | PPP1CC       | PPP1R2B    |
| PRAM1        | PRCC         | PRDX1       | PRKDC       | PRPF6        | PSMA7      |
| PSMC1        | PSME3IP1     | PTBP1       | PTMA        | RACGAP1      | RALYL      |
| RAN          | RANBP2       | RB1         | RBM10       | RBM14        | RBM17      |
| RBM25        | RBM39        | RBMX        | RCC2        | RECQL        | RFC1       |

|        |        |         |         |         |         |
|--------|--------|---------|---------|---------|---------|
| RFC4   | RIMS1  | RPA1    | RPL13   | RPL14   | RPL22   |
| RPL24  | RPL29  | RPL5    | RPS11   | RPS23   | RPS27A  |
| RRP1B  | RSL1D1 | S100A11 | S100A4  | S100A6  | SAFB    |
| SARNP  | SATB1  | SET     | SF3A1   | SF3B1   | SFPQ    |
| SFPQ   | SH3GL1 | SMAP    | SMARCA5 | SMARCC1 | SMARCC2 |
| SMC3   | SNRPA1 | SOD1    | SPR     | SPR14   | SRP14   |
| SRRM1  | SRRM2  | SSB     | STMN1   | SUB1    | SUMO2   |
| TCOF1  | TERF2  | THOC2   | THRAP3  | THUMPD1 | TKT     |
| TMA7   | TMPO   | TMSB4X  | TOP2B   | TP53    | TPM4    |
| TPR    | TRIM28 | TRIR    | TSSC4   | U2AF2   | U2SURP  |
| UBE2E1 | UBE2M  | UPF1    | VAR5    | VIM     | WAS     |
| WBP11  | WDR33  | WIZ     | XPO5    | XRCC4   | YLPM1   |
| ZC3H18 | ZC3H4  | ZMYM3   | ZNF207  | ZNF280C | ZNF706  |
| ZNFX1  | ZRANB2 | ZYX     |         |         |         |

**Table SIII.** siRNA sequences of HMGN1.

| Gene  | Species             | Type | Target sequence (5'-3')  |
|-------|---------------------|------|--------------------------|
| HMGN1 | <i>Homo sapiens</i> | NC   | F: UUCUCCGAACGUGUCACGUTT |
|       |                     |      | R: ACGUGACACGUUCGGAGAAUU |
|       |                     | si-1 | F: GGAUAAA UCUUCAGACAAA  |
|       |                     |      | R: UUUGUCUGAAGAUUUAUCC   |
|       |                     | si-2 | F: UGAUGAAGCAGGAGAGAAA   |
|       |                     |      | R:UUUC UCUCCUGCUUCAUCA   |

siRNA, small interfering RNA; NC, non-targeting control; HMGN1, HMGN1, high-mobility group nucleosome-binding protein 1; F, forward; R, reverse.

**Table SIV.** Primer sequences for the prediction model of LAGs.

| <b>Gene</b> | <b>Primer sequence (5'-3')</b> |
|-------------|--------------------------------|
| FABP5       | F: CCAAGCCAGATTGTATCATCAC      |
|             | R: CATCAGCTGTGGTTTCTTCAAA      |
| HMG1        | F: TGCAAACAAAAGGGAAAAGG        |
|             | R: CATCAGAGGCTGGACTCTCC        |
| ZYG         | F: CAGCAGTTCTACAGTCTGGAG       |
|             | R: GTACTGCTTGTGGTAGTCGG        |
| PAK2        | F: GACAGTTACCTGGTAGGAGATG      |
|             | R: AACTCCAATGCCTGTAAACAC       |
| PPM1G       | F: AACTCCTTCAACAAGAAAATGGC     |
|             | R: TGCCTCAAAGAACTTGGACTT       |
| NUP50       | F: TAGCTCTGTTTTGGGCTCATT       |
|             | R: TGGTGAAGAGACTGGTTTACTC      |
| HDGF        | F: TCAACAGCCAACAATACCAAG       |
|             | R: TTCTCCTTGGATTCCTCGTAAG      |
| PGK1        | F: TTCTGTTCTTGAAGGACTGTGT      |
|             | R: CTTAACCTTGTTCCTCCAGAAGC     |
| G6PD        | F: TCACCAAGAACATTCACGAGTC      |
|             | R: GAAGATCCTGTTGGCAAATCTC      |
| PSMA7       | F: CGAAGCCATTGAAACAGATGAT      |
|             | R: CAAGTTCAATGTTTTTGCCACC      |
| TCOF1       | F: TTTGTCGACCCTAATCGTAGTC      |
|             | R: CAGGAGTCAAGCACTGTGTAG       |
| TKT         | F: AGAAGATCTGGCTATGTTTCGG      |
|             | R: TAGTTCCACTGCCTTCTCTGTA      |
| PFKM        | F: TTGTCCATGAGGGTTATCAAGG      |
|             | R: ATGACACAGAGATTGGTGATCC      |
| ARID3B      | F: GAGAGAAGCCCAGTTCTTGTAT      |
|             | R: GAACTCTGGCTAAGGGACCTAA      |
| GAPDH       | F: TGAACGGGAAGCTCACTGG         |
|             | R: GCTTCACCTTCTTGATGTC         |

F, forward; R, reverse; HMG1, high-mobility group nucleosome-binding protein 1; NUP50, nucleoporin 50; TKT, transketolase; ZYG, zyxin; PAK2, p21 (RAC1) activated kinase 2; ARID3B, AT-rich interaction domain 3B; FABP5, fatty acid binding protein 5; HDGF, hepatoma-derived growth factor; TCOF1, treacle ribosome biogenesis factor 1; PSMA7, proteasome subunit  $\alpha$  type-7; G6PD, glucose-6-phosphate dehydrogenase; PPM1G, protein phosphatase,  $Mg^{2+}/Mn^{2+}$  dependent 1G.

**Table SV.** GO enrichment of the LAG genes.

| <b>Ontology</b> | <b>ID</b>  | <b>Description</b>                       | <b>Set size</b> | <b>Enrichment score</b> | <b>NES</b>   | <b>P-value</b>       | <b>Adjusted P-value</b> | <b>Q-value</b>     |
|-----------------|------------|------------------------------------------|-----------------|-------------------------|--------------|----------------------|-------------------------|--------------------|
| CC              | GO:0005575 | Cellular_component                       | 250             | -0.610003226            | -2.259097512 | 0.000368619235033345 | 0.0190990841151652      | 0.0151085383832746 |
| CC              | GO:0110165 | Cellular anatomical entity               | 250             | -0.610003226            | -2.259097512 | 0.000368619235033345 | 0.0190990841151652      | 0.0151085383832746 |
| CC              | GO:0005925 | Focal adhesion                           | 12              | -0.574898785            | -2.233350264 | 0.00142592618399868  | 0.0289685376270729      | 0.0229158770130994 |
| CC              | GO:0030055 | Cell-substrate junction                  | 12              | -0.574898785            | -2.233350264 | 0.00142592618399868  | 0.0289685376270729      | 0.0229158770130994 |
| MF              | GO:0070851 | Growth factor receptor binding           | 10              | -0.570281124            | -2.039315468 | 0.00286257060056326  | 0.0388874879204204      | 0.0307623706106557 |
| BP              | GO:0018108 | Peptidyl-tyrosine phosphorylation        | 13              | -0.560649651            | -2.221782277 | 0.000897738165294928 | 0.0258810899181165      | 0.0204735178959896 |
| BP              | GO:0018212 | Peptidyl-tyrosine modification           | 13              | -0.560649651            | -2.221782277 | 0.000897738165294928 | 0.0258810899181165      | 0.0204735178959896 |
| BP              | GO:0018193 | Peptidyl-amino acid modification         | 19              | -0.552019               | -2.665236512 | 6.37906576400456e-05 | 0.0176274850611993      | 0.0139444139332451 |
| BP              | GO:0006959 | Humoral immune response                  | 15              | -0.524921566            | -2.253951294 | 0.00134824107563652  | 0.0289685376270729      | 0.0229158770130994 |
| BP              | GO:0051047 | Positive regulation of secretion         | 13              | -0.514101422            | -2.037317647 | 0.00346968519469375  | 0.0429308809910614      | 0.0339609407116136 |
| BP              | GO:1903532 | Positive regulation of secretion by cell | 13              | -0.514101422            | -2.037317647 | 0.00346968519469375  | 0.0429308809910614      | 0.0339609407116136 |
| BP              | GO:0015833 | Peptide transport                        | 15              | -0.503573104            | -2.162283515 | 0.00270979776163083  | 0.0380749549896942      | 0.030119607591365  |
| MF              | GO:0050839 | Cell adhesion molecule binding           | 21              | -0.481677687            | -2.358934761 | 0.000285523970355615 | 0.0190990841151652      | 0.0151085383832746 |
| BP              | GO:0044057 | Regulation of system process             | 17              | -0.47360335             | -2.151664166 | 0.00156644437790304  | 0.0289685376270729      | 0.0229158770130994 |
| BP              | GO:0051046 | Regulation of secretion                  | 21              | -0.471060102            | -2.306936939 | 0.000485630918620261 | 0.0211051564602139      | 0.0166954637479693 |
| BP              | GO:0045765 | Regulation of angiogenesis               | 17              | -0.466942149            | -2.121401147 | 0.00191240360573444  | 0.030794537482061       | 0.0243603540744385 |
| BP              | GO:1901342 | Regulation of vasculature development    | 17              | -0.466942149            | -2.121401147 | 0.00191240360573444  | 0.030794537482061       | 0.0243603540744385 |
| BP              | GO:00428   | Amide transport                          | 17              | -0.466317083            | -2.118561362 | 0.001931623581504    | 0.0307945374820         | 0.0243603540744    |

|    |             |                                                  |    |              |              |                      |                    |                    |
|----|-------------|--------------------------------------------------|----|--------------|--------------|----------------------|--------------------|--------------------|
|    | 86          |                                                  |    |              |              | 43                   | 61                 | 385                |
| BP | GO:0030198  | Extracellular matrix organization                | 23 | -0.466101695 | -2.366092302 | 0.000305046516738724 | 0.0190990841151652 | 0.0151085383832746 |
| BP | GO:0043062  | Extracellular structure organization             | 23 | -0.466101695 | -2.366092302 | 0.000305046516738724 | 0.0190990841151652 | 0.0151085383832746 |
| BP | GO:0045229  | External encapsulating structure organization    | 23 | -0.466101695 | -2.366092302 | 0.000305046516738724 | 0.0190990841151652 | 0.0151085383832746 |
| BP | GO:1903530  | Regulation of secretion by cell                  | 20 | -0.452904105 | -2.196384121 | 0.00144707339435459  | 0.0289685376270729 | 0.0229158770130994 |
| BP | GO:0010243  | Response to organonitrogen compound              | 31 | -0.430317221 | -2.450749756 | 0.000298494862043224 | 0.0190990841151652 | 0.0151085383832746 |
| BP | GO:0007186  | G protein-coupled receptor signaling pathway     | 24 | -0.422888701 | -2.183217587 | 0.00102847334279344  | 0.0280731316439672 | 0.0222075563636487 |
| BP | GO:0023061  | Signal release                                   | 22 | -0.421005325 | -2.119794783 | 0.00139471267517542  | 0.0289685376270729 | 0.0229158770130994 |
| BP | GO:0001666  | Response to hypoxia                              | 24 | -0.406814545 | -2.100232677 | 0.00173369522231175  | 0.030794537482061  | 0.0243603540744385 |
| BP | GO:0006468  | Protein phosphorylation                          | 25 | -0.405657721 | -2.130797523 | 0.00198412020804384  | 0.0310346349522328 | 0.0245502857916844 |
| BP | GO:0016310  | Phosphorylation                                  | 32 | -0.401308745 | -2.327745591 | 0.000336317976653812 | 0.0190990841151652 | 0.0151085383832746 |
| BP | GO:0001932  | Regulation of protein phosphorylation            | 23 | -0.401286816 | -2.037069713 | 0.00326923397873026  | 0.0423467963807405 | 0.0334988942228446 |
| BP | GO:1901698  | Response to nitrogen compound                    | 32 | -0.396025994 | -2.297103595 | 0.000433098645135801 | 0.0208807949441789 | 0.0165179801285295 |
| MF | GO:00140677 | Molecular function activator activity            | 42 | -0.391354568 | -2.458935753 | 0.000222416498355495 | 0.0190990841151652 | 0.0151085383832746 |
| MF | GO:0030546  | Signaling receptor activator activity            | 35 | -0.389973678 | -2.331447763 | 0.000534630018895647 | 0.0211051564602139 | 0.0166954637479693 |
| MF | GO:0048018  | Receptor ligand activity                         | 35 | -0.389973678 | -2.331447763 | 0.000534630018895647 | 0.0211051564602139 | 0.0166954637479693 |
| BP | GO:0032940  | Secretion by cell                                | 26 | -0.388650996 | -2.074502267 | 0.00157247791703049  | 0.0289685376270729 | 0.0229158770130994 |
| BP | GO:00140352 | Export from cell                                 | 26 | -0.388650996 | -2.074502267 | 0.00157247791703049  | 0.0289685376270729 | 0.0229158770130994 |
| BP | GO:0022603  | Regulation of anatomical structure morphogenesis | 32 | -0.385252239 | -2.23461166  | 0.00068568336576507  | 0.0236846462591351 | 0.0187359972312122 |
| BP | GO:00071    | Transmembrane receptor protein tyrosine kinase   | 26 | -0.382513779 | -2.041743647 | 0.002279393735341    | 0.0337431679749    | 0.0266929003217    |

|    |                    |                                                               |    |                  |                  |                              |                            |                            |
|----|--------------------|---------------------------------------------------------------|----|------------------|------------------|------------------------------|----------------------------|----------------------------|
|    | 69                 | signaling pathway                                             |    |                  |                  | 43                           | 651                        | 615                        |
| BP | GO:0<br>0469<br>03 | Secretion                                                     | 34 | -0.37934<br>9    | -2.2494<br>78028 | 0.0009053<br>69852382<br>845 | 0.025881<br>0899181<br>165 | 0.020473<br>5178959<br>896 |
| BP | GO:0<br>0082<br>84 | Positive regulation of cell<br>population proliferation       | 30 | -0.37447<br>1534 | -2.1060<br>292   | 0.0018355<br>65238628<br>82  | 0.030794<br>5374820<br>61  | 0.024360<br>3540744<br>385 |
| BP | GO:0<br>0723<br>59 | Circulatory system<br>development                             | 49 | -0.37226<br>6434 | -2.4948<br>7058  | 0.0001077<br>55068331<br>11  | 0.019099<br>0841151<br>652 | 0.015108<br>5383832<br>746 |
| BP | GO:0<br>0717<br>05 | Nitrogen compound transport                                   | 33 | -0.36854<br>9712 | -2.1669<br>86567 | 0.0012662<br>52185451<br>63  | 0.028968<br>5376270<br>729 | 0.022915<br>8770130<br>994 |
| BP | GO:0<br>0352<br>95 | Tube development                                              | 48 | -0.36406<br>9274 | -2.4029<br>34663 | 0.0001690<br>03714689<br>838 | 0.019099<br>0841151<br>652 | 0.015108<br>5383832<br>746 |
| BP | GO:0<br>0164<br>77 | Cell migration                                                | 57 | -0.35736<br>4393 | -2.4656<br>36859 | 4.7983972<br>6258771e-<br>05 | 0.017627<br>4850611<br>993 | 0.013944<br>4139332<br>451 |
| BP | GO:0<br>0488<br>70 | Cell motility                                                 | 57 | -0.35736<br>4393 | -2.4656<br>36859 | 4.7983972<br>6258771e-<br>05 | 0.017627<br>4850611<br>993 | 0.013944<br>4139332<br>451 |
| MF | GO:0<br>0305<br>45 | Signaling receptor regulator<br>activity                      | 38 | -0.33860<br>9905 | -2.1112<br>32839 | 0.0021805<br>61624101<br>22  | 0.032867<br>0106614<br>53  | 0.025999<br>8065419<br>151 |
| BP | GO:0<br>0714<br>95 | Cellular response to<br>endogenous stimulus                   | 43 | -0.33764<br>3324 | -2.1219<br>61688 | 0.0010497<br>79349774<br>41  | 0.028073<br>1316439<br>672 | 0.022207<br>5563636<br>487 |
| BP | GO:0<br>0067<br>93 | Phosphorus metabolic<br>process                               | 48 | -0.33517<br>2079 | -2.2122<br>07032 | 0.0008040<br>76091188<br>438 | 0.025637<br>6569075<br>083 | 0.020280<br>9475631<br>74  |
| BP | GO:0<br>0067<br>96 | Phosphate-containing<br>compound metabolic process            | 48 | -0.33517<br>2079 | -2.2122<br>07032 | 0.0008040<br>76091188<br>438 | 0.025637<br>6569075<br>083 | 0.020280<br>9475631<br>74  |
| BP | GO:0<br>0019<br>44 | Vasculature development                                       | 41 | -0.33496<br>3779 | -2.1097<br>46613 | 0.0017820<br>97821468<br>82  | 0.030794<br>5374820<br>61  | 0.024360<br>3540744<br>385 |
| BP | GO:1<br>9017<br>01 | Cellular response to<br>oxygen-containing<br>compound         | 41 | -0.31889<br>8098 | -2.0085<br>58017 | 0.0036646<br>11329227<br>1   | 0.044675<br>9234107<br>246 | 0.035341<br>3755125<br>153 |
| BP | GO:2<br>0000<br>26 | Regulation of multicellular<br>organismal development         | 51 | -0.31208<br>3038 | -2.0913<br>75325 | 0.0020759<br>73775330<br>15  | 0.031870<br>0418471<br>981 | 0.025211<br>1435093<br>701 |
| MF | GO:0<br>0987<br>72 | Molecular function regulator<br>activity                      | 62 | -0.31042<br>3769 | -2.1977<br>17992 | 0.0006656<br>49321563<br>047 | 0.023684<br>6462591<br>351 | 0.018735<br>9972312<br>122 |
| BP | GO:0<br>0096<br>53 | Anatomical structure<br>morphogenesis                         | 77 | -0.29457<br>9975 | -2.2413<br>77601 | 0.0004533<br>82761152<br>255 | 0.020880<br>7949441<br>789 | 0.016517<br>9801285<br>295 |
| BP | GO:0<br>0512<br>40 | Positive regulation of<br>multicellular organismal<br>process | 54 | -0.29322<br>4096 | -1.9924<br>7699  | 0.0024930<br>25595369<br>5   | 0.036258<br>2143607<br>248 | 0.028682<br>4551415<br>549 |
| BP | GO:1<br>9017<br>00 | Response to<br>oxygen-containing<br>compound                  | 58 | -0.29265<br>7295 | -2.0354<br>49685 | 0.0014514<br>33206789<br>15  | 0.028968<br>5376270<br>729 | 0.022915<br>8770130<br>994 |
| MF | GO:0<br>0051       | Signaling receptor binding                                    | 56 | -0.28899<br>8607 | -1.9835<br>92263 | 0.0025676<br>54301403        | 0.036699<br>7485493        | 0.029031<br>7355675        |

|    |            |                                           |     |                   |                  |                      |                    |                    |
|----|------------|-------------------------------------------|-----|-------------------|------------------|----------------------|--------------------|--------------------|
|    | 02         |                                           |     |                   |                  | 34                   | 685                | 913                |
| BP | GO:0071310 | Cellular response to organic substance    | 56  | -0.287918853      | -1.976181183     | 0.00282657160916653  | 0.0388874879204204 | 0.0307623706106557 |
| MF | GO:0005515 | Protein binding                           | 208 | -0.286514494      | -2.010699109     | 0.00140098784063613  | 0.0289685376270729 | 0.0229158770130994 |
| BP | GO:0009719 | Response to endogenous stimulus           | 57  | -0.278453166      | -1.921188576     | 0.00290835253445846  | 0.0388874879204204 | 0.0307623706106557 |
| BP | GO:0048518 | Positive regulation of biological process | 117 | -0.272234936      | -2.235745802     | 0.000350647514200826 | 0.0190990841151652 | 0.0151085383832746 |
| BP | GO:0006950 | Response to stress                        | 90  | -0.271057513      | -2.116408377     | 0.00062976207501403  | 0.0236846462591351 | 0.0187359972312122 |
| BP | GO:0048731 | System development                        | 92  | -0.261508366      | -2.044869392     | 0.00186296029086618  | 0.030794537482061  | 0.0243603540744385 |
| BP | GO:0050896 | Response to stimulus                      | 161 | -0.261151511      | -2.108011403     | 0.0012232064742139   | 0.0289685376270729 | 0.0229158770130994 |
| BP | GO:0070887 | Cellular response to chemical stimulus    | 80  | -0.253171531      | -1.963502997     | 0.00308528936832333  | 0.0405984902593657 | 0.0321158776351785 |
| BP | GO:0051716 | Cellular response to stimulus             | 135 | -0.251620483      | -2.08578835      | 0.00143039778187006  | 0.0289685376270729 | 0.0229158770130994 |
| BP | GO:0042221 | Response to chemical                      | 106 | -0.246844474      | -1.991616811     | 0.00154280672586062  | 0.0289685376270729 | 0.0229158770130994 |
| BP | GO:0050794 | Regulation of cellular process            | 168 | -0.244681156      | -1.954250665     | 0.00341820469747849  | 0.0429308809910614 | 0.0339609407116136 |
| BP | GO:0044255 | Cellular lipid metabolic process          | 25  | 0.464925772106875 | 2.27588130241744 | 0.000270386732338723 | 0.0190990841151652 | 0.0151085383832746 |

GO, Gene Ontology; BP, biological process; CC, cellular component; MF, molecular function; LAG, lactylation-related genes; ID, identifier.
